# Supplementary material
Source: publisher figshare collection journal article supplement (https://acs.figshare.com/ndownloader/files/9420163)
Supplement: Supplementary file 1 [file 9420163]

# Supporting Information

## Highly recyclable fluoride for enhanced cascade hydrosilylation-cyclization of levulinates to $\gamma$ -valerolactone at low temperatures

Wenfeng Zhao,<sup>a,†</sup> Tingting Yang,<sup>a,†</sup> Hu Li,<sup>a,\*</sup> Weibo Wu,<sup>a</sup> Zhongwei Wang,<sup>a</sup> Chengjiang Fang,<sup>a</sup>  
Shunmugavel Saravanamurugan<sup>b</sup> and Song Yang<sup>a,\*</sup>

<sup>a</sup> *State-Local Joint Engineering Lab for Comprehensive Utilization of Biomass, State Key Laboratory Breeding Base of Green Pesticide and Agricultural Bioengineering (Ministry of Education), Center for R&D of Fine Chemicals, Guizhou University, Guizhou, Guiyang 550025, China*

<sup>b</sup> *Center of Innovative and Applied Bioprocessing, Mohali 160071, Punjab, India*

† W.Z. and T.Y. contributed equally to this work.

\* Corresponding Authors

E-mail: lhpesticide@163.com (H.L.); jhzx.msm@gmail.com (S.Y.)

Number of Pages: 13

Number of Figures: 10

Number of Tables: 3

## Experimental section

### *Materials*

Diphenyl (silane-d<sub>2</sub>) (97 atom % D) was purchased from Sigma-Aldrich Co. LLC. Poly(methylhydrosiloxane) (PMHS), dimethyl sulfoxide (DMSO, >99.8%), and *N,N*-dimethyl formamide (DMF, 99.8%) were purchased from Shanghai Aladdin Industrial Inc. *n*-Butanol (AR), methanol (AR), THF (AR), and *n*-hexane (AR) were bought from Beijing J&K Scientific Ltd. Trimethoxysilane (>99%), triethoxysilane (98%), phenylsilane (>97%), diphenylsilane (>98%), heptamethyltrisiloxane ( $\geq$ 98%), triethylsilane (99%), tetramethyldisiloxane (>98%), KF (99%), CsF (99%), LiF (>99%), NaF (>99%), KCl (>99%), KBr (>99%) DMSO-d<sub>6</sub> (99.8 atom%D), methyl levulinate (>99%), ethyl levulinate (EL, 99%), *n*-butyl levulinate (>98%),  $\alpha$ -angelica lactone (98%), 2(5H)-furanone (98%), and  $\gamma$ -valerolactone (GVL, 99%) were purchased from Beijing Innochem Sci. & Tech. Co. Ltd.

### *Catalysts Characterization*

BET (Brunauer–Emmett–Teller) surface areas of the porous materials were determined from nitrogen physisorption measurements at liquid nitrogen temperature on a Micromeritics ASAP 2010 instrument (Tristar II 3020, Norcross, GA). XPS (X-ray photoelectron spectroscopy) measurements were recorded using a Physical Electronics Quantum 2000 Scanning ESCA Microprobe (Physical Electronics Inc., PHI, MN) equipped with a monochromatic AlK $\alpha$  anode. EDX (Energy dispersive X-ray) spectrum was acquired with an aberration corrected FEI TECNAI G2 F30 S-TWIN (S)TEM (Hillsboro, OR) operating at 300 kV. ICP-OES (inductively coupled plasma-optical emission spectrometer) was recorded on an Optima 5300 DV instrument (PerkinElmer Inc., Waltham, MA).

### *Reaction procedures*

All the reactions were carried out in a 15 mL Ace tube. In a typical procedure, 0.5 mmol EL, 15 mg KF, 2.0 mL DMF and 2.5 equiv. PMHS were added into the tube, which was magnetically stirred at 650 rpm for a specific reaction time. The time zero was defined as the tube was placed into an oil bath that was preheated to 40, 60, 80 and 100 °C (or at room temperature). After the reaction, liquid products were quantitatively analyzed by GC (Agilent 7890B).

### *Analysis of products*

Liquid products and major by-products were identified with GC-MS (Agilent 6890N GC/5973 MS, Santa Clara, CA). The reaction mixtures were quantitatively analyzed with GC (Agilent 7890B) with a HP-5 column (30 m  $\times$  0.320 mm  $\times$  0.25  $\mu$ m) and a flame ionization detector using naphthalene as internal standard and referring to the standard curves (with  $R^2 \geq 0.996$ ) made from commercial samples.

#### ***Catalyst recycling***

After each cycle of reaction, the remaining catalyst in the mixture was recovered by centrifugation, followed by successively washing with DMF, ethanol and acetone for 3-5 times, and drying at 80 °C in N<sub>2</sub> for 5 h, which was then directly used for the next run.

#### ***Isotopic labeling experiments***

For isotopic kinetic and mechanism study, <sup>1</sup>H, <sup>13</sup>C and <sup>19</sup>F NMR spectra of the reaction mixtures were performed in the deuterium solvent DMSO-d<sub>6</sub> on a JEOL-ECX 500 NMR spectrometer at room temperature spectrometer operating at 500 MHz.

**Table S1.** Some previously reported results of EL-to-GVL conversion with different H-donors

| Entry | Catalyst                                            | Mole of substrate | Mole/Pressure of H-donor | Temp.(°C)  | Conv.(%) | Yield(%) | Sel.(%) | Ref. |
|-------|-----------------------------------------------------|-------------------|--------------------------|------------|----------|----------|---------|------|
| 1     | Au-Pd/TiO <sub>2</sub>                              | 51.7 mmol         | 4 MPa H <sub>2</sub>     | <b>200</b> | 90       | 87.8     | 97.5    | S1   |
| 2     | Cu/Al <sub>2</sub> O <sub>3</sub> -SiO <sub>2</sub> | 0.54 mmol         | 3 MPa H <sub>2</sub>     | <b>160</b> | 99       | 95       | 96      | S2   |
| 3     | Ni/SiO <sub>2</sub>                                 | 0.5 mmol          | 3 MPa H <sub>2</sub>     | <b>250</b> | 99       | 88       | 0.88    | S3   |
| 4     | Fe <sub>3</sub> (CO) <sub>12</sub>                  | 1 mmol            | 4 mmol HCOOH             | <b>180</b> | 100      | 92       | 92      | S4   |
| 5     | Ru/C                                                | 8.6 mmol          | 52 mmol HCOOH            | <b>190</b> | 87       | 75       | 86      | S5   |
| 6     | ZrO(OH) <sub>2</sub> ·xH <sub>2</sub> O             | 11.6 mmol         | 633 mmol 2-propanol      | <b>240</b> | 93.6     | 88.5     | 94.5    | S6   |
| 7     | Cu-Ni/Al <sub>2</sub> O <sub>3</sub>                | 1 mmol            | 21.8 mmol 2-butanol      | <b>150</b> | 99       | 97       | 97.9    | S7   |
| 8     | Hf-ATMP                                             | 1 mmol            | 50 mmol 2-propanol       | <b>150</b> | 86       | 85.5     | 86      | S8   |

**Table S2.** The effect of different silanes on the conversion of EL to GVL

| Silane name                    | Structure                                                      | EL conv. (%) | GVL yield (%) | GVL sel. (%) |
|--------------------------------|----------------------------------------------------------------|--------------|---------------|--------------|
| Trimethoxysilane               | (MeO) <sub>3</sub> SiH                                         | 62           | 26            | 42           |
| Triethoxysilane                | (EtO) <sub>3</sub> SiH                                         | 92           | 68            | 74           |
| Phenylsilane                   | PhSiH <sub>3</sub>                                             | 95           | 79            | 83           |
| Diphenylsilane                 | Ph <sub>2</sub> SiH <sub>2</sub>                               | 90           | 82            | 91           |
| Triethylsilane                 | Et <sub>3</sub> SiH                                            | 23           | 11            | 48           |
| Heptamethyltrisiloxane         | Me <sub>3</sub> Si-O-MeSiH-O-SiMe <sub>3</sub>                 | 66           | 61            | 92           |
| Tetramethyldisiloxane          | Me <sub>2</sub> SiH-O-HSiMe <sub>2</sub>                       | 57           | 53            | 93           |
| Polymethylhydrosiloxane (PMHS) | Me <sub>3</sub> Si-O-(MeSiH-O) <sub>n</sub> -SiMe <sub>3</sub> | 94           | 91            | 97           |

Reaction conditions: 0.5 mmol EL, 15 mg KF, 0.1 g silane, 2.0 mL DMF, 80 °C, 7 h.

The relative activity of different silanes for the conversion of EL to GVL seems to be depended on the stabilization possibility of each silicon atom.

**Table S3.** Surface area, volume and porosity of Fresh and reused KF

| Catalyst  | S <sub>BET</sub> (m <sup>2</sup> /g) <sup>[a]</sup> | S <sub>micro</sub> (m <sup>2</sup> /g) <sup>[b]</sup> | S <sub>meso</sub> (m <sup>2</sup> /g) <sup>[c]</sup> | V <sub>pore</sub> (cm <sup>3</sup> /g) <sup>[d]</sup> | D <sub>mean</sub> (nm) <sup>[e]</sup> |
|-----------|-----------------------------------------------------|-------------------------------------------------------|------------------------------------------------------|-------------------------------------------------------|---------------------------------------|
| Fresh KF  | 37                                                  | 26                                                    | 11                                                   | 0.05                                                  | 4.7                                   |
| Reused KF | 125                                                 | 50                                                    | 75                                                   | 0.29                                                  | 8.4                                   |

<sup>[a]</sup> BET surface area was obtained from N<sub>2</sub> adsorption isotherm. <sup>[b]</sup> Surface area of micropore was gained from the t-plot method. <sup>[c]</sup> Surface area of mesopore = (S<sub>BET</sub> - S<sub>micro</sub>). <sup>[d]</sup> Volume of pores was estimated from BJH Adsorption cumulative volume of pores. <sup>[e]</sup> Average pore size was estimated from the adsorption average pore diameter.

N<sub>2</sub> adsorption-desorption shows that the reused KF catalyst possesses an enhanced average pore diameter (8.4 nm), surface area (125 m<sup>2</sup>/g) and pore volume (0.29 cm<sup>3</sup>/g), as compared with the fresh KF (Table S3), which can be ascribed to the formation of PMHS-based resin.

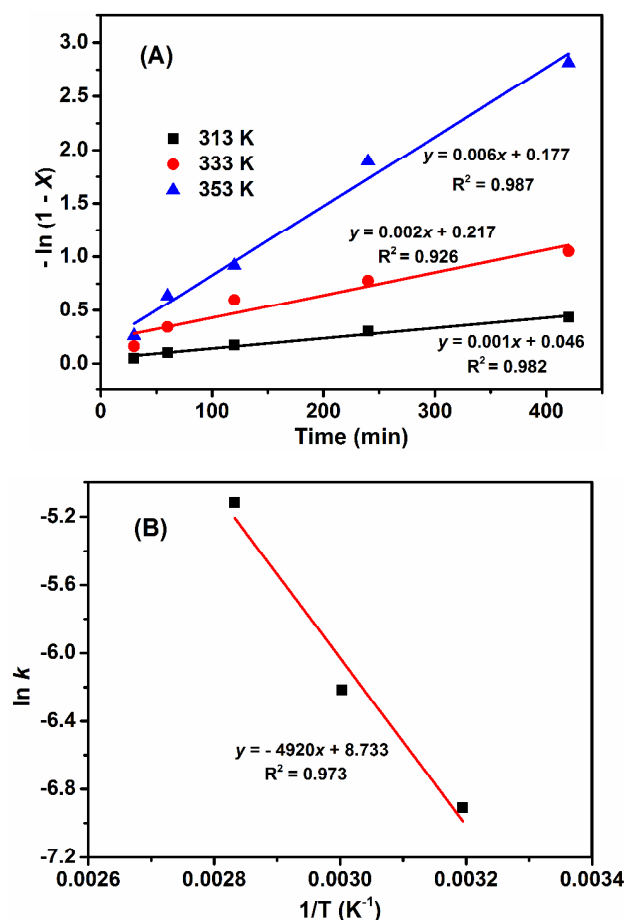

**Figure S1.** (A) Kinetic profiles and (B) Arrhenius plot of KF-catalyzed conversion of EL to GVL; Reaction conditions: 0.5 mmol EL, 2.5 equiv. PMHS, 15 mg KF, and 2.0 mL DMF

Assumed that EL-to-GVL conversion is a 1<sup>st</sup> order process, the reaction rate could be expressed as follows:  $d[\text{GVL}]/dt = k[\text{EL}] = d[\text{EL}]/dt$ ; after the subsequent integral calculation, the original equation would further become:  $-\ln(1 - X) = kt + C$ . Values of  $-\ln(1 - X)$  (where  $X$  is conversion of EL) were plotted against reaction time ( $t$ ) at different temperatures in order to obtain rate constants ( $k$ ):  $k(80\text{ }^\circ\text{C}) = 0.006\text{ min}^{-1} > k(60\text{ }^\circ\text{C}) = 0.002\text{ min}^{-1} > k(40\text{ }^\circ\text{C}) = 0.001\text{ min}^{-1}$  (FigureS2A). Then the activation energy ( $E_a$ ) was calculated from rate constants by the Arrhenius equation:  $\ln k = -E_a/RT + \ln A$  (FigureS2B), and found to be 40.9 kJ/mol.

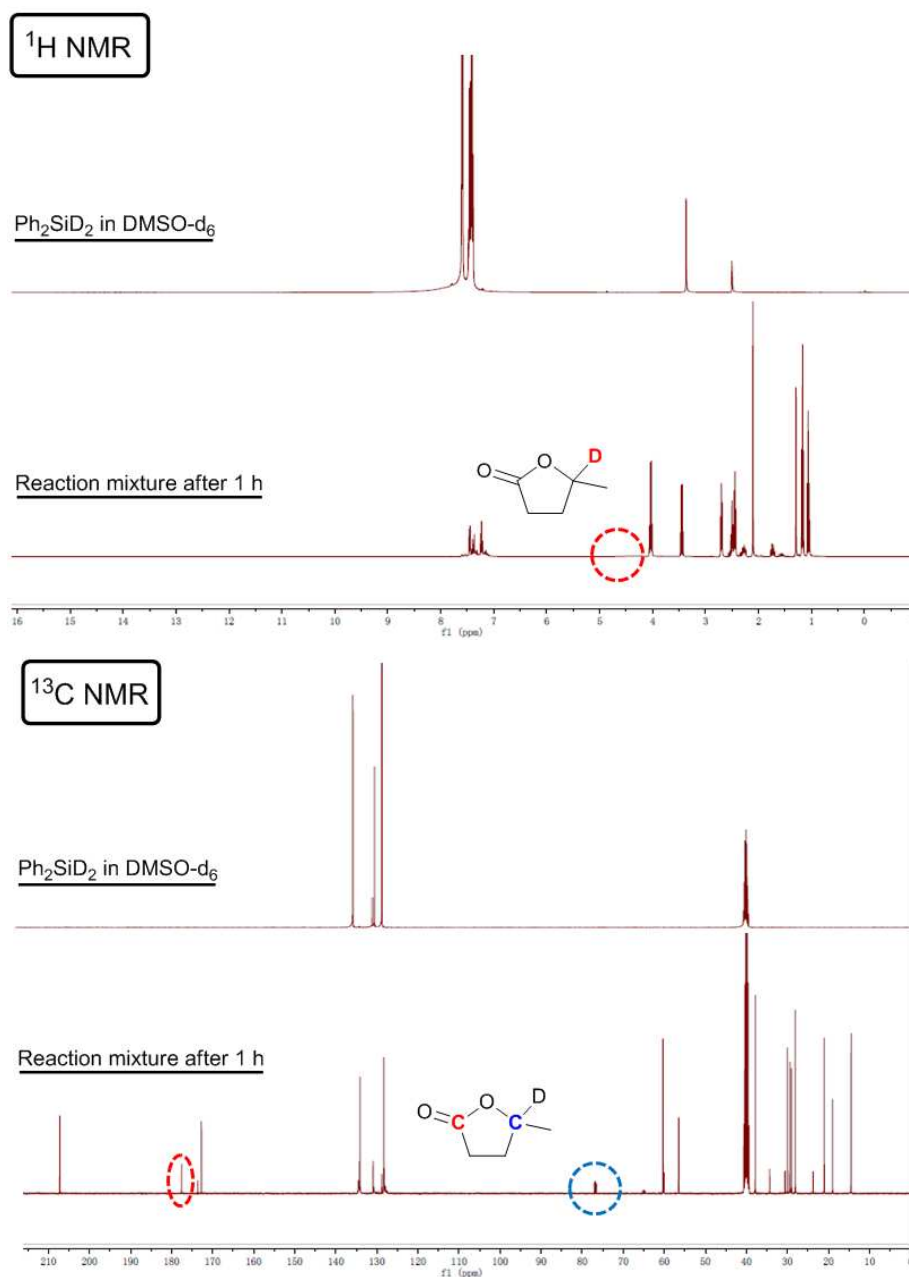

**Figure S2.** <sup>1</sup>H and <sup>13</sup>C NMR spectra of EL-to-GVL conversion in DMSO-d<sub>6</sub>; Reaction conditions: 0.5 mmol EL, 2.5 equiv. Ph<sub>2</sub>SiD<sub>2</sub>, 15 mg KF, 2.0 mL DMSO-d<sub>6</sub>, 80 °C for 1 h

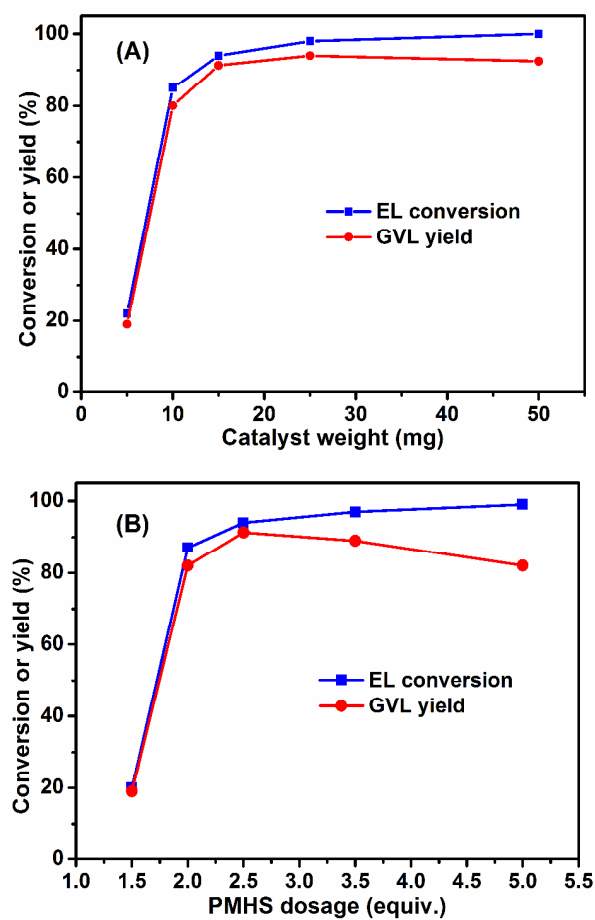

**Figure S3.** (A) The effect of catalyst weight and (B) PMHS dosage on the conversion of EL to GVL; Reaction conditions: 0.5 mmol EL, 2.5 equiv. (or variable) PMHS, 15 mg (or variable) KF, 2.0 mL DMF, 80 °C for 7 h

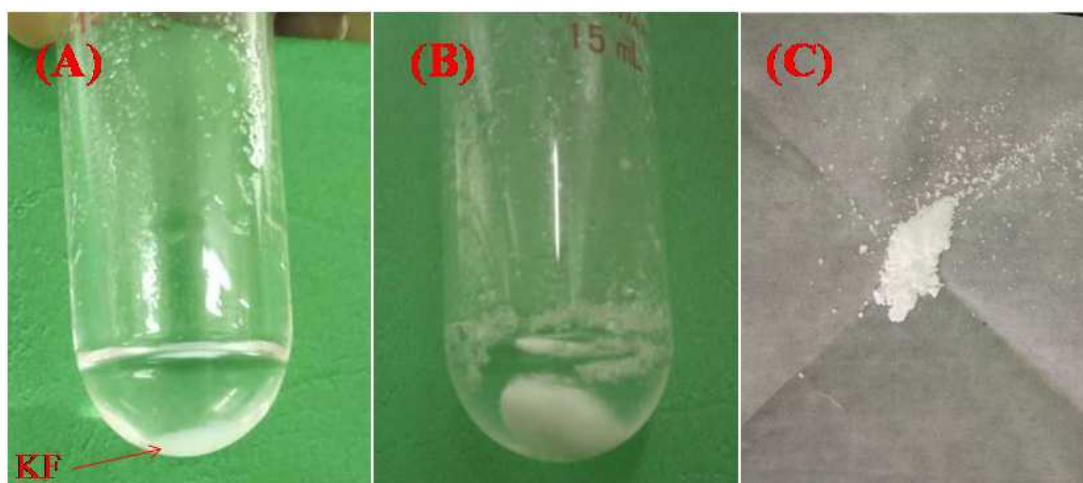

**Figure S4.** Photos of the KF-catalyzed reaction: (A) initial reaction solution, (B) after the reaction, and (C) the recovered silicone resin containing F species

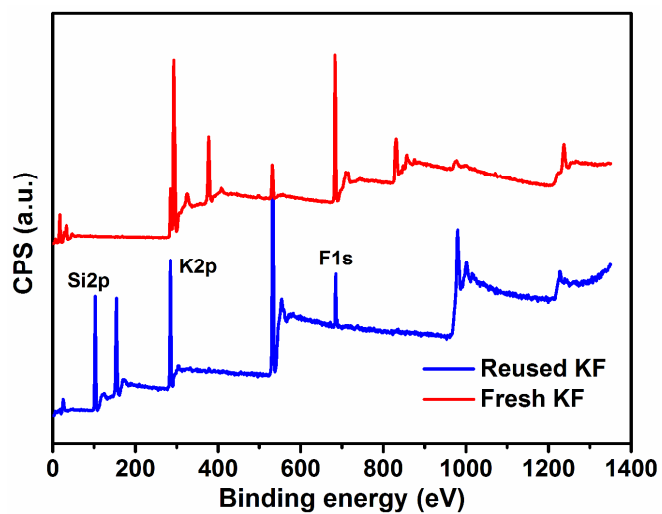

**Figure S5.** XPS spectra of fresh and recovered KF after six cycles



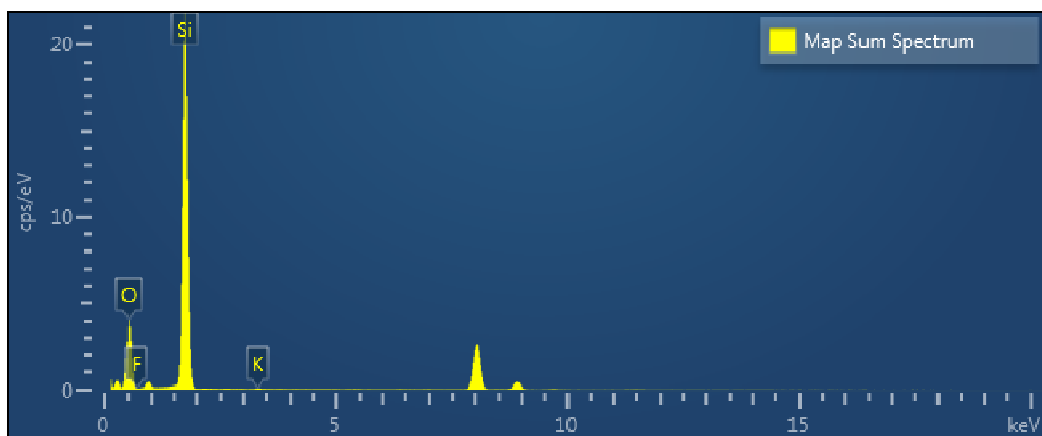

| Element | Line Type | k factor | Absorption Correction | Wt%           |
|---------|-----------|----------|-----------------------|---------------|
| O       | K series  | 1.86867  | 1.00                  | <b>17.87</b>  |
| F       | K series  | 1.75182  | 1.00                  | <b>5.06</b>   |
| Si      | K series  | 1.00000  | 1.00                  | <b>75.40</b>  |
| K       | K series  | 0.96973  | 1.00                  | <b>1.67</b>   |
| Total:  |           |          |                       | <b>100.00</b> |

**Figure S6.** EDX spectrum and results of recovered KF after six cycles

**Weight of F in the fresh catalyst** =  $15 \text{ mg} \times 19/58 = 4.91 \text{ mg}$

**Weight of F in the recovered catalyst after six cycles** =  $90 \text{ mg} \times 5.06 \% = 4.55 \text{ mg}$

These results showed the little leaching of fluoride into solution during six consecutive cycles, which was consistent with the results of ICP-OES.

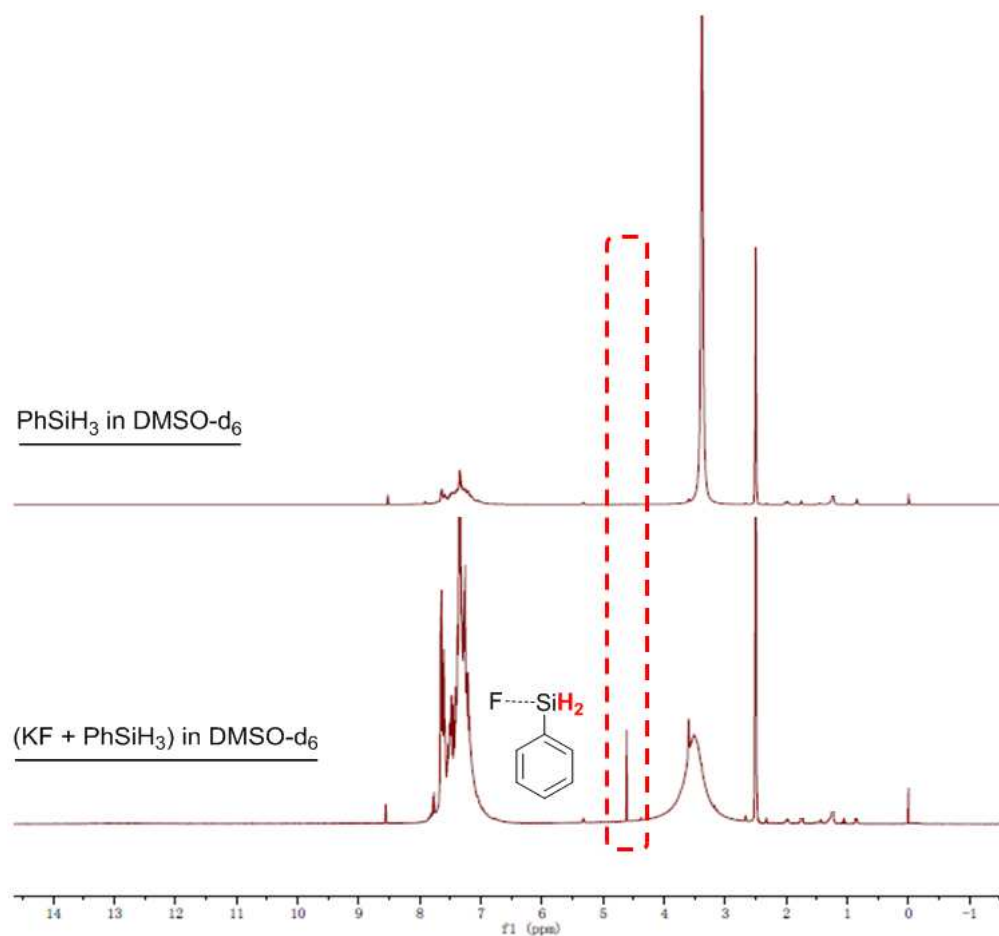

**Figure S7.**  $^1\text{H}$  NMR spectra of PhSiH<sub>3</sub> in DMSO-d<sub>6</sub> without or with KF stirring for 10 min

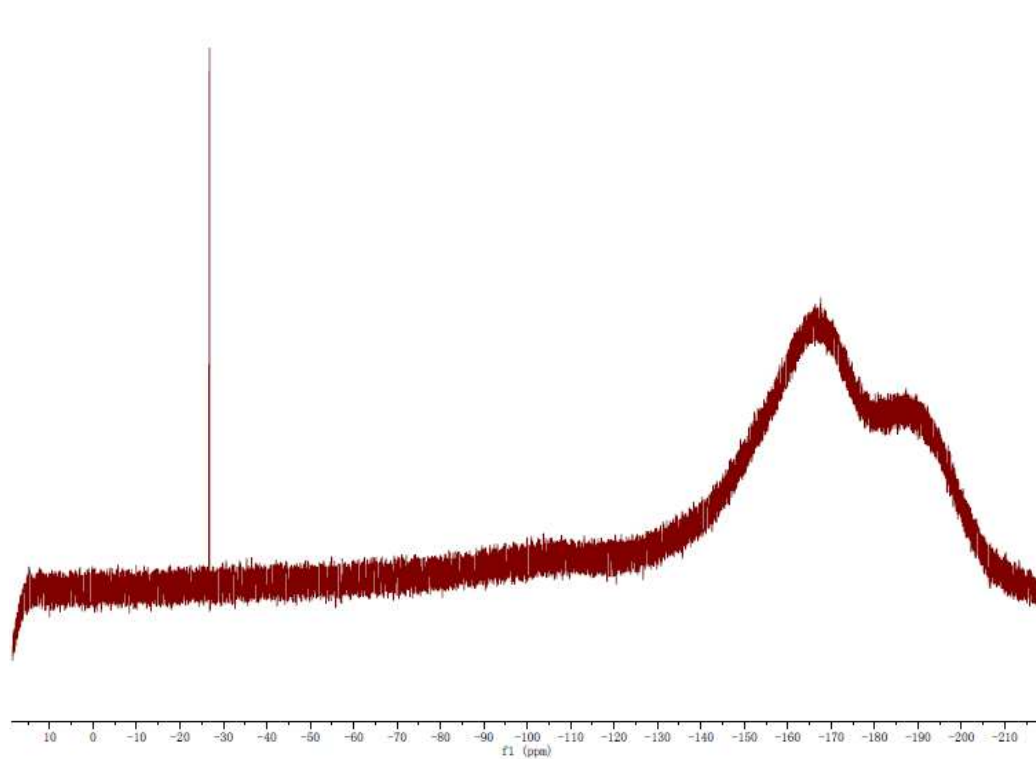

**Figure S8.**  $^{19}\text{F}$  NMR spectrum of  $\text{PhSiH}_3$  in  $\text{DMSO-d}_6$  with KF stirring for 10 min

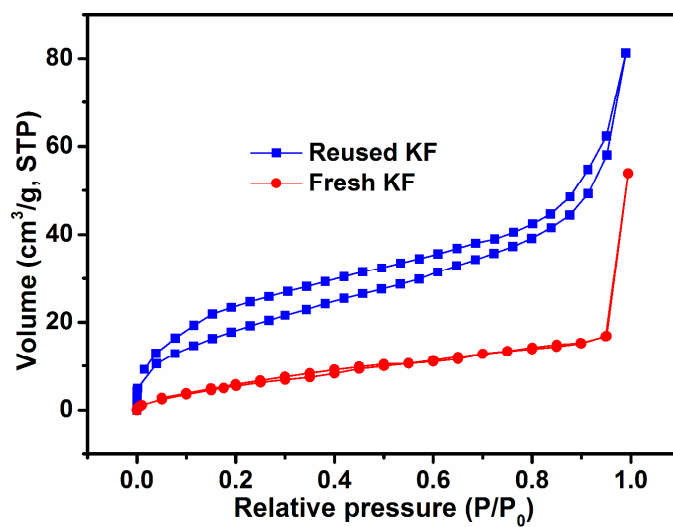

**Figure S9.** N<sub>2</sub> adsorption-desorption isotherms of fresh and recovered KF after six cycles

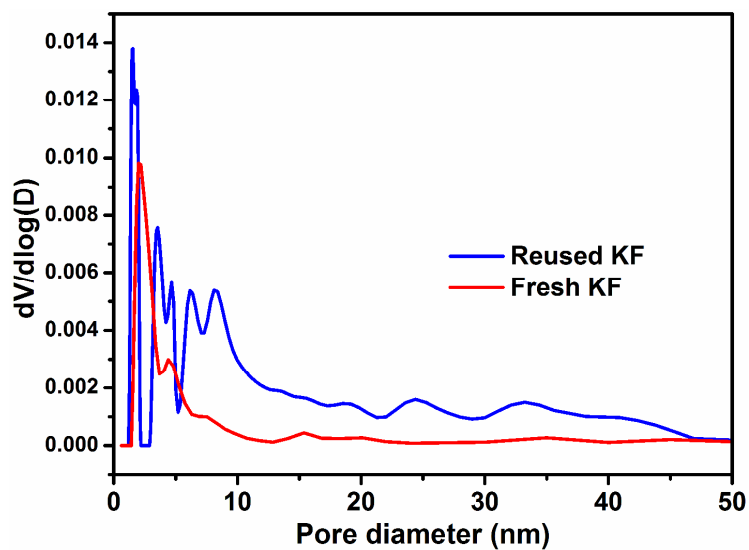

**Figure S10.** Pore size distribution of fresh and recovered KF after six cycles

## References:

- S1. Luo, W.; Sankar, M.; Beale, A. M.; He, Q.; Kiely, C. J.; Bruijninx, P. C.; Weckhuysen, B. M. *Nat. Commun.* **2015**, *6*, 7540-7550.
- S2. Zheng, J.; Zhu, J.; Xu, X.; Wang, W.; Li, J.; Zhao, Y.; Tang, Y. *Sci. Rep.*, **2016**, *6*, 28898-28907.
- S3. Ruppert, A. M.; Jędrzejczyk, M.; Sneká-Płatek, O.; Keller, N.; Dumon, A. S.; Michel, C.; Sautet, P.; Grams, J. *Green Chem.* **2016**, *18*, 2014-2028.
- S4. Ortiz-Cervantes, C.; Flores-Alamo, M.; García, J. J. *ACS Catal.* **2015**, *5*, 1424-1431.
- S5. Metzker, G.; Burtoloso, A. C. *Chem. Commun.* **2015**, *51*, 14199-14202.
- S6. Tang, X.; Chen, H.; Hu, L.; Hao, W.; Sun, Y.; Zeng, X.; Lin, L.; Liu, S. *Appl. Catal. B: Environ.* **2014**, *147*, 827-834.
- S7. Mohan, V.; Venkateshwarlu, V.; Pramod, C. V.; Raju, B. D.; Rao, K. S. R. *Catal. Sci. Technol.* **2014**, *4*, 1253-1259.
- S8. Xie, C.; Song, J.; Zhou, B.; Hu, J.; Zhang, Z.; Zhang, P.; Jiang, Z.; Han, B. *ACS Sustainable Chem. Eng.* **2016**, *4*, 6231-6236.
